# Supplementary material for: Flash monitor initiation is associated with improvements in HbA1c levels and DKA rates among people with type 1 diabetes in Scotland: a retrospective nationwide observational study
Source: Springer Nature journal article supplement (doi:10.1007/s00125-021-05578-1), 2021-10-07
Supplement: MOESM1 [file 19737286]

# Supplementary Material for Flash monitor initiation is associated with improvements in HbA<sub>1c</sub> levels and DKA rates among people with type 1 Diabetes in Scotland: a retrospective nationwide observational study

A. Jeyam    F.W. Gibb    J.A. McKnight    J.E. O'Reilly    T.M. Caparrotta    A. Höhn  
S.J. McGurnaghan    L.A.K. Blackburn    S. Hatam    B. Kennon    R. McCrimmon  
G. Leesell    S. Philip    N. Sattar    P. M. McKeigue    H. M. Colhoun  
On behalf of the SDRN Epi Group

## Methods

### Exposure, outcomes and covariates

Diabetic ketoacidosis (DKA) events were defined as any hospital admission or death, involving an ICD10 diagnosis code of E10.1, E11.1, E12.1, E13.1 or E14.1 at any level of the reasons for admission or causes of death.

Severe hypoglycaemic (SHH) events were defined as any hospital admission or death involving an ICD10 diagnosis code of E15, E16.0, E16.1, E16.2 at any level of the reasons for admission or causes of death.

### Statistical analyses

#### HbA<sub>1c</sub>

Since the distribution of HbA<sub>1c</sub> was skewed, HbA<sub>1c</sub> was log-transformed. We used linear mixed models with log-transformed HbA<sub>1c</sub> as the outcome. Fixed effects included were age at flash monitor (FM) initiation, diabetes duration at FM initiation, sex, log(baseline HbA<sub>1c</sub>), time (in years and centered on FM initiation such date of FM initiation=0) and categorical time of FM-usage (years, reference category=no FM usage). The model also included random effects on the individuals: random intercept and slope on time. The within-individual error-correlation structure was specified as a CAR1 autoregressive structure to allow for exponentially decayed correlation in measurements the further apart they are in time.

We formally tested the significance of interaction terms using fully adjusted versions of the mixed models described previously. Fixed effects included were: age, sex, SIMD, diabetes duration, baseline HbA<sub>1c</sub>, FM-exposure time and the interaction term (time of FM-use)\*group of interest. Significance of the interaction term was assessed using Likelihood Ratio Tests comparing models with and without the interaction term. For this purpose, models were fitted using Maximum Likelihood (ML) so as to appropriately compare models with different fixed effects.

### Sensitivity analyses

To account for any trends occurring over the same calendar-time as FM-initiation, we randomly selected for each FM user from the population under study, an individual matched in age band and baseline HbA<sub>1c</sub> band, who was not using any device (CSII/FM/CGM) at the date of FM-initiation in the user and for at least six months thereafter and assigning the user's FM start date as their index date. Non-users' person-time were censored as soon as they started using any device.

## Results

ESM Table 1: Characteristics of FM users at baseline (defined as the two-year window prior to FM initiation), and of the matched non-users

| Variable                                      | FM users (N=12,256)  |             | Matched non-users (N=11,682) |             |
|-----------------------------------------------|----------------------|-------------|------------------------------|-------------|
| Variable                                      | N(%) or Median (IQR) | Missing (%) | N(%) or Median (IQR)         | Missing (%) |
| Sex: Female                                   | 6073 (49.6)          | 0.0         | 5751 (49.2)                  | 0.0         |
| Age at initiation                             | 37.9 (24.2, 52.6)    | 0.0         | 39.3 (25.6, 54.1)            | 0.0         |
| Diabetes duration at initiation               | 17.5 (6.9, 29.3)     | 0.0         | 17.8 (7.4, 29.0)             | 0.0         |
| Prior Pump/CGM usage                          | 2867 (23.4)          | 0.0         | -                            | 0.0         |
| HbA <sub>1c</sub> band at baseline (mmol/mol) |                      | 1.2         |                              | 4.2         |
| <54 [7.1%]                                    | 1711 (14.1)          |             | 1606 (14.4)                  |             |
| 54-63 [7.1-7.9%]                              | 3381 (27.9)          |             | 2814 (25.2)                  |             |
| 64-74 [8.0-8.9%]                              | 3345 (27.6)          |             | 3019 (27.0)                  |             |
| 75-84 [9.1-9.8%]                              | 1717 (14.2)          |             | 1708 (15.3)                  |             |
| >84 [9.8%]                                    | 1956 (16.2)          |             | 2039 (18.2)                  |             |
| BMI (kg/m <sup>2</sup> )                      | 25.4 (22.2, 29.0)    | 3.7         | 25.8 (22.4, 29.6)            | 10.0        |
| Total cholesterol (mmol/l)                    | 4.6 (4.0, 5.2)       | 16.9        | 4.6 (4.0, 5.3)               | 21.5        |
| Systolic blood pressure (mmHg)                | 128.0 (119.0, 138.0) | 8.9         | 128.5 (119.0, 138.0)         | 11.0        |
| Diastolic blood pressure (mmHg)               | 76.0 (70.0, 81.0)    | 8.9         | 75.0 (70.0, 80.5)            | 11.0        |
| CKDEPI- eGFR (mL/min/1.73m <sup>2</sup> )     |                      | 10.9        |                              | 13.7        |
| <15                                           | 109 (1.0)            |             | 157 (1.6)                    |             |
| 15-30                                         | 57 (0.5)             |             | 94 (0.9)                     |             |
| 30-60                                         | 498 (4.6)            |             | 537 (5.3)                    |             |
| 60-90                                         | 2572 (23.5)          |             | 2097 (20.8)                  |             |
| ≥90                                           | 7688 (70.4)          |             | 7198 (71.4)                  |             |
| Albuminuric status: micro/macro albuminuria   | 2185 (23.9)          | 25.3        | 2012 (26.7)                  | 35.6        |
| SIMD Quintile                                 |                      | 0.0         |                              | 7.3         |
| Q1 (most deprived)                            | 1778 (15.5)          |             | 2589 (23.9)                  |             |
| Q2                                            | 2354 (20.5)          |             | 2340 (21.6)                  |             |
| Q3                                            | 2324 (20.2)          |             | 2201 (20.3)                  |             |
| Q4                                            | 2493 (21.7)          |             | 2002 (18.5)                  |             |
| Q5 (least deprived)                           | 2548 (22.2)          |             | 1698 (15.7)                  |             |
| Ever prior DKA admission in the last 5 years  | 2026 (16.5)          | 0.1         | 2047 (17.5)                  | 0.1         |
| Ever prior Hypo admission in the last 5 years | 712 (5.8)            | 0.1         | 646 (5.5)                    | 0.1         |

ESM Table 2: Estimated fold-change (95 % CI) in HbA<sub>1c</sub> yearly pre-exposure and for FM-exposed time compared to the counterfactual- overall and stratified by baseline HbA<sub>1c</sub> band- from mixed models adjusting for sex, baseline HbA<sub>1c</sub>, age and diabetes duration at FM initiation

| Variable                          | Overall           | Baseline HbA <sub>1c</sub> band |                           |                           |                           |                   |
|-----------------------------------|-------------------|---------------------------------|---------------------------|---------------------------|---------------------------|-------------------|
|                                   |                   | <54 mmol/mol [7.1%]             | 54-63 mmol/mol [7.1-7.9%] | 64-74 mmol/mol [8.0-8.9%] | 75-84 mmol/mol [9.0-9.8%] | >84 mmol/mol      |
| Time effect (years)               | 0.99 (0.99; 0.99) | 0.96 (0.96; 0.96)               | 0.98 (0.98; 0.98)         | 0.99 (0.99; 1.00)         | 1.00 (1.00; 1.01)         | 1.01 (1.01; 1.02) |
| <b>FM usage (ref=no FM usage)</b> |                   |                                 |                           |                           |                           |                   |
| 0-1 year                          | 0.94 (0.94; 0.95) | 1.08 (1.07; 1.09)               | 0.99 (0.99; 1.00)         | 0.95 (0.95; 0.96)         | 0.91 (0.90; 0.92)         | 0.77 (0.76; 0.78) |
| 1-2 years                         | 0.98 (0.98; 0.99) | 1.18 (1.16; 1.19)               | 1.03 (1.03; 1.04)         | 0.98 (0.98; 0.99)         | 0.93 (0.91; 0.94)         | 0.79 (0.78; 0.81) |
| 2 or more years                   | 0.99 (0.98; 1.00) | 1.22 (1.18; 1.25)               | 1.06 (1.05; 1.08)         | 0.98 (0.96; 1.00)         | 0.91 (0.88; 0.94)         | 0.75 (0.72; 0.78) |
| Number of observations            | 63330             | 8952                            | 18526                     | 17793                     | 8993                      | 9066              |
| Number of individuals             | 11353             | 1621                            | 3173                      | 3114                      | 1614                      | 1831              |

ESM Table 3: Baseline HbA<sub>1c</sub> distribution (mmol/mol) - Median (IQR) - across strata of interest. Data are dual reported in HbA<sub>1c</sub> percentage units.

| Strata                    |               | Baseline HbA <sub>1c</sub> distribution (mmol/mol) | N                                    |      |
|---------------------------|---------------|----------------------------------------------------|--------------------------------------|------|
| Age-band at FM initiation | <13           | 61.5 (55.5, 70.0)<br>7.8 (7.2, 8.6)%               | 1063                                 |      |
|                           | 13-18         | 66.0 (58.0, 80.0)<br>8.2 (7.5, 9.5)%               | 1028                                 |      |
|                           | 19-24         | 72.0 (61.0, 88.0)<br>8.7 (7.7, 10.2)%              | 1137                                 |      |
|                           | 25-44         | 67.0 (58.0, 79.5)<br>8.3 (7.5, 9.4)%               | 4323                                 |      |
|                           | 45-64         | 66.5 (58.0, 76.5)<br>8.2 (7.5, 9.1)%               | 3775                                 |      |
|                           | >64           | 64.0 (57.0, 72.0)<br>8.0 (7.4, 8.7)%               | 930                                  |      |
|                           | SIMD quintile | Q1 (most deprived)                                 | 71.0 (61.0, 85.0)<br>8.6 (7.7, 9.9)% | 1778 |
|                           |               | Q2                                                 | 69.0 (60.0, 80.0)<br>8.5 (7.6, 9.5)% | 2354 |
| Q3                        |               | 66.0 (58.0, 78.0)<br>8.2 (7.5, 9.3)%               | 2324                                 |      |
| Q4                        |               | 65.0 (57.0, 75.5)<br>8.1 (7.4, 9.1)%               | 2493                                 |      |
| Q5 (least deprived)       |               | 63.0 (56.0, 72.0)<br>7.9 (7.3, 8.7)%               | 2548                                 |      |
| Sex                       | Female        | 67.0 (58.0, 78.0)<br>8.3 (7.5, 9.3)%               | 6073                                 |      |
|                           | Male          | 66.0 (58.0, 77.0)<br>8.2 (7.5, 9.2)%               | 6183                                 |      |
| Prior/current pump use    | No            | 68.0 (59.0, 80.0)<br>8.4 (7.5, 9.5)%               | 9389                                 |      |
|                           | Yes           | 61.5 (55.0, 69.0)<br>7.8 (7.2, 8.5)%               | 2867                                 |      |
| Prior CMG use             | No            | 66.0 (58.0, 78.0)<br>8.2 (7.5, 9.3)%               | 12196                                |      |
|                           | Yes           | 60.5 (53.0, 67.5)<br>7.7 (7.0, 8.3)%               | 60                                   |      |
| Prior completed education | No            | 66.0 (58.0, 78.0)<br>8.2 (7.5, 9.3)%               | 8587                                 |      |
|                           | Yes           | 66.0 (58.0, 76.5)<br>8.2 (7.5, 9.1)%               | 3669                                 |      |
| Early adopter             | No            | 66.5 (58.0, 78.0)<br>8.2 (7.5, 9.3)%               | 11303                                |      |
|                           | Yes           | 64.0 (56.5, 74.0)<br>8.0 (7.3, 8.9)%               | 953                                  |      |

ESM Table 4: Absolute within-person differences in HbA<sub>1c</sub> (mmol/mol), with respect to baseline, over time from FM initiation (years), stratified by age band at FM initiation - N and median (IQR). Data are dual reported in HbA<sub>1c</sub> percentage units.

| Time from FM initiation (yrs)                                                                                                                               | Age <13 y.o.                                | Age 13-18 y.o.                            | Age 19-24 y.o.                              | Age 25-44 y.o.                               | Age 45-64 y.o.                              | Age >64 y.o.                               |
|-------------------------------------------------------------------------------------------------------------------------------------------------------------|---------------------------------------------|-------------------------------------------|---------------------------------------------|----------------------------------------------|---------------------------------------------|--------------------------------------------|
| <b>Pre-FM</b>                                                                                                                                               |                                             |                                           |                                             |                                              |                                             |                                            |
| 4-5 yrs bef.                                                                                                                                                | 2.00(-3.00,8.00) 282<br>0.2(-0.3,0.7)%      | -2.50(-11.00,5.00) 611<br>-0.2(-1.0,0.5)% | 0.50(-9.00,10.50) 803<br>0.0(-0.8,1.0)%     | 2.00(-5.00,10.00) 3260<br>0.2(-0.5,0.9)%     | 1.00(-4.00,7.00) 3259<br>0.1(-0.4,0.6)%     | 0.88(-4.00,5.50) 866<br>0.1(-0.4,0.5)%     |
| 3-4 yrs bef.                                                                                                                                                | 1.00(-4.00,6.00) 402<br>0.1(-0.4,0.5)%      | -2.50(-11.50,4.50) 707<br>-0.2(-1.1,0.4)% | 1.00(-8.00,10.00) 834<br>0.1(-0.7,0.9)%     | 1.00(-5.00,8.50) 3389<br>0.1(-0.5,0.8)%      | 1.00(-4.00,6.00) 3308<br>0.1(-0.4,0.5)%     | 1.00(-3.62,5.00) 880<br>0.1(-0.3,0.5)%     |
| 2-3 yrs bef.                                                                                                                                                | 1.00(-3.00,5.50) 545<br>0.1(-0.3,0.5)%      | -1.50(-8.00,4.00) 785<br>-0.1(-0.7,0.4)%  | 1.00(-5.00,8.25) 853<br>0.1(-0.5,0.8)%      | 1.00(-4.00,6.50) 3486<br>0.1(-0.4,0.6)%      | 0.50(-3.00,5.00) 3357<br>0.0(-0.3,0.5)%     | 0.50(-3.00,4.00) 872<br>0.0(-0.3,0.4)%     |
| 1-2 yrs bef.                                                                                                                                                | ref. 710                                    | ref. 862                                  | ref. 904                                    | ref. 3627                                    | ref. 3422                                   | ref. 889                                   |
| 0-1 yr bef.                                                                                                                                                 | ref. 1042                                   | ref. 1012                                 | ref. 1071                                   | ref. 4129                                    | ref. 3667                                   | ref. 913                                   |
| <b>Post-FM</b>                                                                                                                                              |                                             |                                           |                                             |                                              |                                             |                                            |
| 0-1 yr aft.                                                                                                                                                 | -1.50(-7.50,3.00) 1005**<br>-0.1(-0.7,0.3)% | 0.00(-7.00,7.00) 968-<br>0.0(-0.6,0.6)%   | -4.50(-14.00,2.50) 927**<br>-0.4(-1.3,0.2)% | -4.00(-11.00,1.50) 3682**<br>-0.4(-1.0,0.1)% | -3.00(-8.50,1.50) 3341**<br>-0.3(-0.8,0.1)% | -0.88(-5.00,3.50) 838**<br>-0.1(-0.5,0.3)% |
| 1-2 yrs aft.                                                                                                                                                | 1.00(-5.00,6.00) 618-<br>0.1(-0.5,0.5)%     | 4.00(-3.50,12.00) 533-<br>0.4(-0.3,1.1)%  | -4.00(-14.00,4.50) 403**<br>-0.4(-1.3,0.4)% | -2.00(-9.50,4.00) 1767**<br>-0.2(-0.9,0.4)%  | -2.50(-8.00,3.00) 1556**<br>-0.2(-0.7,0.3)% | 0.50(-4.00,5.00) 423-<br>0.0(-0.4,0.5)%    |
| 2+ yrs aft.                                                                                                                                                 | 0.00(-4.50,4.00) 106-<br>0.0(-0.4,0.4)%     | 5.00(-5.00,11.25) 82-<br>0.5(-0.5,1.0)%   | -9.00(-20.50,4.50) 54**<br>-0.8(-1.9,0.4)%  | -3.00(-10.62,2.50) 271**<br>-0.3(-1.0,0.2)%  | -5.00(-9.50,0.12) 187**<br>-0.5(-0.9,0.0)%  | -2.25(-7.62,3.12) 58-<br>-0.2(-0.7,0.3)%   |
| <i>Note:</i>                                                                                                                                                |                                             |                                           |                                             |                                              |                                             |                                            |
| For post-exposure years, significance of Wilcoxon signed-rank test p adjusted for multiple comparisons denoted by ** (p<0.01), * ( 0.01 ≤ p<0.05) or - (NS) |                                             |                                           |                                             |                                              |                                             |                                            |

ESM Table 5: Estimated fold-change (95 % CI) in HbA<sub>1c</sub> yearly pre-exposure and for FM-exposed time compared to the counterfactual- stratified by age at FM initiation from mixed models adjusting for sex, baseline HbA<sub>1c</sub>, age and diabetes duration at FM initiation

| Variable                          | <13 y.o.          | 13-18 y.o.        | 19-24 y.o.        | 25-44 y.o.        | 45-64 y.o.        | >64 y.o.          |
|-----------------------------------|-------------------|-------------------|-------------------|-------------------|-------------------|-------------------|
| Time effect (years)               | 0.97 (0.96; 0.97) | 1.01 (1.01; 1.02) | 0.99 (0.99; 1.00) | 0.99 (0.99; 0.99) | 0.99 (0.99; 0.99) | 1.00 (0.99; 1.00) |
| <b>FM usage (ref=no FM usage)</b> |                   |                   |                   |                   |                   |                   |
| 0-1 year                          | 0.96 (0.95; 0.97) | 0.95 (0.94; 0.96) | 0.91 (0.90; 0.93) | 0.93 (0.93; 0.94) | 0.95 (0.94; 0.95) | 0.99 (0.98; 1.00) |
| 1-2 years                         | 1.05 (1.03; 1.06) | 1.00 (0.98; 1.02) | 0.94 (0.92; 0.96) | 0.97 (0.96; 0.98) | 0.97 (0.97; 0.98) | 1.03 (1.01; 1.04) |
| 2 or more years                   | 1.10 (1.06; 1.14) | 1.01 (0.97; 1.05) | 0.92 (0.88; 0.97) | 0.98 (0.96; 1.00) | 0.97 (0.96; 0.99) | 1.03 (1.00; 1.06) |
| Number of observations            | 4730              | 5562              | 5738              | 21762             | 20343             | 5195              |
| Number of individuals             | 1042              | 1013              | 1086              | 3928              | 3451              | 833               |

ESM Table 6: Absolute within-person changes from baseline in HbA<sub>1c</sub> (mmol/mol) following FM initiation - median (IQR)|N - by age band \* baseline HbA<sub>1c</sub> category. Data are dual reported in HbA<sub>1c</sub> percentage units.

|                                  | <13y.                                            | 13-18y.                                       | 19-24y.                                         | 25-44y.                                          | 45-64y.                                        | >64                                          |
|----------------------------------|--------------------------------------------------|-----------------------------------------------|-------------------------------------------------|--------------------------------------------------|------------------------------------------------|----------------------------------------------|
| <b>&lt;58 mmol/mol [7.5%]</b>    |                                                  |                                               |                                                 |                                                  |                                                |                                              |
| 0-1 yr aft.                      | 1.00(-2.00,4.00) 341<br>0.09(-0.18,0.37)%        | 2.25(-1.00,7.50) 238<br>0.21(-0.09,0.69)%     | 1.50(-3.00,6.00) 188<br>0.14(-0.27,0.55)%       | 0.00(-3.50,4.50) 894<br>0.00(-0.32,0.41)%        | 0.00(-3.50,4.00) 776<br>0.00(-0.32,0.37)%      | 0.50(-2.00,4.25) 231<br>0.05(-0.18,0.39)%    |
| 1-2 yrs aft.                     | 3.00(-1.00,7.50) 239<br>0.27(-0.09,0.69)%        | 5.50(0.00,11.25) 159<br>0.50(0.00,1.03)%      | 3.00(-3.00,8.00) 89<br>0.27(-0.27,0.73)%        | 2.00(-3.00,6.25) 479<br>0.18(-0.27,0.57)%        | 1.00(-3.00,5.50) 389<br>0.09(-0.27,0.50)%      | 3.00(-1.50,6.50) 121<br>0.27(-0.14,0.59)%    |
| 2+ yrs aft.                      | 0.00(-3.62,4.12) 47<br>0.00(-0.33,0.38)%         | 7.00(2.25,11.75) 21<br>0.64(0.21,1.08)%       | 5.50(-3.00,11.00) 13<br>0.50(-0.27,1.01)%       | 0.00(-3.00,6.50) 86<br>0.00(-0.27,0.59)%         | -1.00(-5.00,4.00) 42<br>-0.09(-0.46,0.37)%     | 6.50(1.00,11.00) 16<br>0.59(0.09,1.01)%      |
| <b>58-75 mmol/mol [7.5-9.0%]</b> |                                                  |                                               |                                                 |                                                  |                                                |                                              |
| 0-1 yr aft.                      | -1.00(-6.00,2.50) 491<br>-0.09(-0.55,0.23)%      | 1.00(-5.00,7.50) 421<br>0.09(-0.46,0.69)%     | -3.00(-9.00,2.00) 335<br>-0.27(-0.82,0.18)%     | -3.50(-8.50,1.00) 1598<br>-0.32(-0.78,0.09)%     | -3.00(-7.00,1.00) 1607<br>-0.27(-0.64,0.09)%   | -0.50(-5.00,3.00) 455<br>-0.05(-0.46,0.27)%  |
| 1-2 yrs aft.                     | 0.75(-4.00,5.50) 296<br>0.07(-0.37,0.50)%        | 4.50(-3.00,12.31) 248<br>0.41(-0.27,1.13)%    | -2.25(-11.50,5.00) 140<br>-0.21(-1.05,0.46)%    | -2.50(-8.00,3.00) 796<br>-0.23(-0.73,0.27)%      | -2.50(-7.00,2.62) 792<br>-0.23(-0.64,0.24)%    | -10.25(-13.75,0.00) <10<br>0.00(-0.45,0.37)% |
| 2+ yrs aft.                      | 1.25(-4.62,4.62) 46<br>0.11(-0.42,0.42)%         | 6.00(-5.00,12.50) 46<br>0.55(-0.46,1.14)%     | -5.00(-13.00,4.00) 17<br>-0.46(-1.19,0.37)%     | -4.50(-11.00,1.00) 125<br>-0.41(-1.01,0.09)%     | -5.00(-8.50,-1.00) 109<br>-0.46(-0.78,-0.09)%  | -4.00(-7.50,2.00) 34<br>-0.37(-0.69,0.18)%   |
| <b>≥75 mmol/mol [9.0%]</b>       |                                                  |                                               |                                                 |                                                  |                                                |                                              |
| 0-1 yr aft.                      | -30.50(-50.00,-12.00) 173<br>-2.79(-4.58,-1.10)% | -7.00(-26.50,5.00) 309<br>-0.64(-2.42,0.46)%  | -12.00(-25.00,-1.00) 404<br>-1.10(-2.29,-0.09)% | -11.00(-21.50,-2.50) 1190<br>-1.01(-1.97,-0.23)% | -8.50(-16.00,-1.00) 958<br>-0.78(-1.46,-0.09)% | -4.75(-12.00,1.00) 152<br>-0.43(-1.10,0.09)% |
| 1-2 yrs aft.                     | -19.50(-46.75,-4.50) 83<br>-1.78(-4.28,-0.41)%   | -3.88(-14.38,11.00) 126<br>-0.35(-1.32,1.01)% | -12.00(-23.00,-1.12) 174<br>-1.10(-2.10,-0.10)% | -9.50(-21.12,0.12) 492<br>-0.87(-1.93,0.01)%     | -8.00(-16.00,0.00) 375<br>-0.73(-1.46,0.00)%   | -3.25(-9.00,3.62) 68<br>-0.30(-0.82,0.33)%   |
| 2+ yrs aft.                      | -10.00(-21.00,1.00) 13<br>-0.91(-1.92,0.09)%     | -8.50(-29.00,1.50) 15<br>-0.78(-2.65,0.14)%   | -20.50(-32.25,-10.50) 24<br>-1.88(-2.95,-0.96)% | -13.00(-28.00,1.00) 60<br>-1.19(-2.56,0.09)%     | -15.00(-22.88,-4.25) 36<br>-1.37(-2.09,-0.39)% | -10.25(-13.75,0.00) 8<br>-0.94(-1.26,0.00)%  |

ESM Table 7: Absolute within-person differences in HbA<sub>1c</sub> (mmol/mol) with respect to baseline over time from FM initiation (years), overall and stratified by SIMD quintile - Median (IQR)|N. Data are dual reported in HbA<sub>1c</sub> percentage units.

| Time from FM initiation (yrs)                                                                                                                              | Q1                                           | Q2                                          | Q3                                          | Q4                                          | Q5                                          |
|------------------------------------------------------------------------------------------------------------------------------------------------------------|----------------------------------------------|---------------------------------------------|---------------------------------------------|---------------------------------------------|---------------------------------------------|
| <b>Pre-FM</b>                                                                                                                                              |                                              |                                             |                                             |                                             |                                             |
| 4-5 yrs bef.                                                                                                                                               | 1.00(-6.50,10.00) 1271<br>0.1(-0.6,0.9)%     | 1.00(-6.00,8.50) 1700<br>0.1(-0.5,0.8)%     | 1.00(-5.50,8.00) 1673<br>0.1(-0.5,0.7)%     | 1.00(-5.00,7.50) 1855<br>0.1(-0.5,0.7)%     | 1.00(-4.00,6.50) 1873<br>0.1(-0.4,0.6)%     |
| 3-4 yrs bef.                                                                                                                                               | 1.00(-6.50,8.00) 1323<br>0.1(-0.6,0.7)%      | 1.00(-6.00,7.00) 1782<br>0.1(-0.5,0.6)%     | 1.00(-4.50,7.00) 1785<br>0.1(-0.4,0.6)%     | 1.00(-5.00,6.00) 1921<br>0.1(-0.5,0.5)%     | 0.50(-4.50,6.00) 1984<br>0.0(-0.4,0.5)%     |
| 2-3 yrs bef.                                                                                                                                               | 1.00(-5.00,6.00) 1385<br>0.1(-0.5,0.5)%      | 0.50(-4.50,6.00) 1866<br>0.0(-0.4,0.5)%     | 0.50(-4.00,5.50) 1864<br>0.0(-0.4,0.5)%     | 0.50(-4.00,6.00) 2019<br>0.0(-0.4,0.5)%     | 0.50(-3.50,5.00) 2061<br>0.0(-0.3,0.5)%     |
| 1-2 yrs bef.                                                                                                                                               | ref. 1471                                    | ref. 1966                                   | ref. 1969                                   | ref. 2101                                   | ref. 2187                                   |
| 0-1 yr bef.                                                                                                                                                | ref. 1716                                    | ref. 2274                                   | ref. 2242                                   | ref. 2400                                   | ref. 2455                                   |
| <b>Post-FM</b>                                                                                                                                             |                                              |                                             |                                             |                                             |                                             |
| 0-1 yr aft.                                                                                                                                                | -2.50(-10.00,4.00) 1528**<br>-0.2(-0.9,0.4)% | -2.50(-9.50,3.00) 2068**<br>-0.2(-0.9,0.3)% | -2.50(-9.00,2.00) 2019**<br>-0.2(-0.8,0.2)% | -3.00(-9.00,2.00) 2194**<br>-0.3(-0.8,0.2)% | -3.00(-8.50,1.50) 2272**<br>-0.3(-0.8,0.1)% |
| 1-2 yrs aft.                                                                                                                                               | -0.50(-8.00,6.00) 718-<br>0.0(-0.7,0.5)%     | -0.50(-8.00,6.00) 1012*<br>0.0(-0.7,0.5)%   | -1.50(-8.00,5.00) 996**<br>-0.1(-0.7,0.5)%  | -1.50(-8.00,4.00) 1116**<br>-0.1(-0.7,0.4)% | -1.50(-7.00,4.00) 1257**<br>-0.1(-0.6,0.4)% |
| 2+ yrs aft.                                                                                                                                                | -4.50(-11.00,2.00) 70**<br>-0.4(-1.0,0.2)%   | -2.50(-10.00,3.75) 106**<br>-0.2(-0.9,0.3)% | -2.00(-8.00,3.00) 131**<br>-0.2(-0.7,0.3)%  | -3.00(-9.50,5.00) 167**<br>-0.3(-0.9,0.5)%  | -2.00(-8.00,4.00) 272**<br>-0.2(-0.7,0.4)%  |
| <i>Note:</i>                                                                                                                                               |                                              |                                             |                                             |                                             |                                             |
| For post-exposure years, significance of Wilcoxon signed-rank test p adjusted for multiple comparisons denoted by ** (p<0.01), * (0.01 ≤ p<0.05) or - (NS) |                                              |                                             |                                             |                                             |                                             |

ESM Table 8: Estimated fold-change (95 % CI) in HbA<sub>1c</sub> yearly pre-exposure and for FM-exposed time compared to the counterfactual- overall and stratified by SIMD quintile from mixed models adjusting for sex, baseline HbA<sub>1c</sub>, age and diabetes duration at FM initiation

| Variable                          | Q1                | Q2                | Q3                | Q4                | Q5                |
|-----------------------------------|-------------------|-------------------|-------------------|-------------------|-------------------|
| Time effect (years)               | 0.99 (0.99; 1.00) | 0.99 (0.99; 0.99) | 0.99 (0.99; 0.99) | 0.99 (0.99; 0.99) | 0.99 (0.99; 0.99) |
| <b>FM usage (ref=no FM usage)</b> |                   |                   |                   |                   |                   |
| 0-1 year                          | 0.94 (0.94; 0.95) | 0.95 (0.94; 0.95) | 0.94 (0.94; 0.95) | 0.94 (0.94; 0.95) | 0.94 (0.93; 0.94) |
| 1-2 years                         | 0.99 (0.98; 1.01) | 0.99 (0.98; 1.00) | 0.99 (0.98; 1.00) | 0.98 (0.97; 0.99) | 0.97 (0.96; 0.98) |
| 2 or more years                   | 0.96 (0.92; 0.99) | 0.99 (0.96; 1.02) | 0.99 (0.96; 1.01) | 1.00 (0.98; 1.02) | 0.99 (0.98; 1.01) |
| Number of observations            | 9506              | 12795             | 12725             | 13843             | 14461             |
| Number of individuals             | 1757              | 2330              | 2297              | 2455              | 2514              |



ESM Table 9: Absolute within-person differences in HbA<sub>1c</sub> (mmol/mol), with respect to baseline, by time from FM initiation (years), stratified by prior pump usage - N and median (IQR). Data are dual reported in HbA<sub>1c</sub> percentage units

| Time from FM initiation (yrs) | No prior pump/cgm use                        | Prior pump use                              |
|-------------------------------|----------------------------------------------|---------------------------------------------|
| <b>Pre-FM</b>                 |                                              |                                             |
| 4-5 yrs bef.                  | 0.50(-5.50,7.50) 6707<br>0.0(-0.5,0.7)%      | 2.50(-4.00,9.00) 2374<br>0.2(-0.4,0.8)%     |
| 3-4 yrs bef.                  | 0.50(-5.00,6.50) 6981<br>0.0(-0.5,0.6)%      | 1.00(-4.50,7.00) 2539<br>0.1(-0.4,0.6)%     |
| 2-3 yrs bef.                  | 0.50(-4.00,5.50) 7258<br>0.0(-0.4,0.5)%      | 1.00(-3.50,5.50) 2640<br>0.1(-0.3,0.5)%     |
| 1-2 yrs bef.                  | ref. 7677                                    | ref. 2737                                   |
| 0-1 yr bef.                   | ref. 9024                                    | ref. 2810                                   |
| <b>Post-FM</b>                |                                              |                                             |
| 0-1 yr aft.                   | -3.00(-10.50,2.00) 8082**<br>-0.3(-1.0,0.2)% | -1.50(-6.00,3.00) 2679**<br>-0.1(-0.5,0.3)% |
| 1-2 yrs aft.                  | -2.00(-9.00,4.50) 3628**<br>-0.2(-0.8,0.4)%  | 0.00(-5.00,5.50) 1672-<br>0.0(-0.5,0.5)%    |
| 2+ yrs aft.                   | -4.00(-11.00,3.00) 470**<br>-0.4(-1.0,0.3)%  | -1.00(-6.50,4.00) 288**<br>-0.1(-0.6,0.4)%  |

ESM Table 10: Estimated fold-change (95 % CI) in HbA<sub>1c</sub> yearly pre-exposure and for FM-exposed time compared to the counterfactual- stratified by prior pump usage from mixed models adjusting for sex, age, baseline HbA<sub>1c</sub>, and diabetes duration at FM initiation

| Variable                          | Prior pump use=No | Yes               |
|-----------------------------------|-------------------|-------------------|
| Time effect (years)               | 0.99 (0.99; 0.99) | 0.99 (0.99; 0.99) |
| <b>FM usage (ref=no FM usage)</b> |                   |                   |
| 0-1 year                          | 0.93 (0.92; 0.93) | 0.99 (0.98; 0.99) |
| 1-2 years                         | 0.97 (0.96; 0.97) | 1.03 (1.03; 1.04) |
| 2 or more years                   | 0.96 (0.95; 0.98) | 1.05 (1.03; 1.07) |
| Number of observations            | 46635             | 16695             |
| Number of individuals             | 8684              | 2669              |

ESM Table 11: Absolute within-person differences in HbA<sub>1c</sub> (mmol/mol), with respect to baseline, by time from FM initiation (years), stratified by prior completed diabetes education programme - N and median (IQR). Data are dual reported in HbA<sub>1c</sub> percentage units

| Time from FM initiation (yrs) | Prior education=No                          | Yes                                         |
|-------------------------------|---------------------------------------------|---------------------------------------------|
| <b>Pre-FM</b>                 |                                             |                                             |
| 4-5 yrs bef.                  | 1.00(-6.00,7.50) 5948<br>0.1(-0.5,0.7)%     | 2.00(-4.50,8.50) 3133<br>0.2(-0.4,0.8)%     |
| 3-4 yrs bef.                  | 0.50(-5.00,6.50) 6288<br>0.0(-0.5,0.6)%     | 1.00(-4.50,7.00) 3232<br>0.1(-0.4,0.6)%     |
| 2-3 yrs bef.                  | 0.50(-4.00,5.50) 6612<br>0.0(-0.4,0.5)%     | 1.00(-3.50,5.50) 3286<br>0.1(-0.3,0.5)%     |
| 1-2 yrs bef.                  | ref. 7017                                   | ref. 3397                                   |
| 0-1 yr bef.                   | ref. 8253                                   | ref. 3581                                   |
| <b>Post-FM</b>                |                                             |                                             |
| 0-1 yr aft.                   | -2.50(-9.00,3.00) 7454**<br>-0.2(-0.8,0.3)% | -3.00(-9.00,1.50) 3307**<br>-0.3(-0.8,0.1)% |
| 1-2 yrs aft.                  | -1.00(-7.62,5.00) 3680**<br>-0.1(-0.7,0.5)% | -1.50(-7.50,4.00) 1620**<br>-0.1(-0.7,0.4)% |
| 2+ yrs aft.                   | -2.00(-9.00,3.50) 563**<br>-0.2(-0.8,0.3)%  | -3.00(-11.12,3.50) 195**<br>-0.3(-1.0,0.3)% |

ESM Table 12: Estimated fold-change (95 % CI) in HbA<sub>1c</sub> yearly pre-exposure and for FM-exposed time compared to the counterfactual- stratified by prior completed diabetes education programme, from mixed models adjusting for sex, age, baseline HbA<sub>1c</sub> and diabetes duration at FM initiation

| Variable                          | Prior completed education=No | Yes               |
|-----------------------------------|------------------------------|-------------------|
| Time effect (years)               | 0.99 (0.99; 0.99)            | 0.99 (0.99; 0.99) |
| <b>FM usage (ref=no FM usage)</b> |                              |                   |
| 0-1 year                          | 0.94 (0.93; 0.94)            | 0.95 (0.95; 0.96) |
| 1-2 years                         | 0.98 (0.97; 0.99)            | 0.99 (0.98; 1.00) |
| 2 or more years                   | 0.98 (0.97; 1.00)            | 1.01 (0.99; 1.03) |
| Number of observations            | 43391                        | 19939             |
| Number of individuals             | 8007                         | 3346              |

ESM Table 13: Absolute within-person differences in HbA<sub>1c</sub> (mmol/mol), with respect to baseline, by time from FM initiation (years), stratified by early adoption of FM - N and median (IQR). Data are dual reported in HbA<sub>1c</sub> percentage units.

| Time from FM initiation (yrs) | Early adopter=No                            | Yes                                         |
|-------------------------------|---------------------------------------------|---------------------------------------------|
| <b>Pre-FM</b>                 |                                             |                                             |
| 4-5 yrs bef.                  | 1.00(-5.00,8.00) 8429<br>0.1(-0.5,0.7)%     | 2.00(-4.00,8.00) 652<br>0.2(-0.4,0.7)%      |
| 3-4 yrs bef.                  | 1.00(-5.00,6.50) 8819<br>0.1(-0.5,0.6)%     | 1.00(-4.00,7.00) 701<br>0.1(-0.4,0.6)%      |
| 2-3 yrs bef.                  | 0.50(-4.00,5.50) 9171<br>0.0(-0.4,0.5)%     | 1.00(-4.00,5.50) 727<br>0.1(-0.4,0.5)%      |
| 1-2 yrs bef.                  | ref. 9603                                   | ref. 811                                    |
| 0-1 yr bef.                   | ref. 10930                                  | ref. 904                                    |
| <b>Post-FM</b>                |                                             |                                             |
| 0-1 yr aft.                   | -2.50(-9.00,2.50) 9874**<br>-0.2(-0.8,0.2)% | -3.00(-9.00,1.00) 887**<br>-0.3(-0.8,0.1)%  |
| 1-2 yrs aft.                  | -0.50(-7.00,5.00) 4508**<br>0.0(-0.6,0.5)%  | -4.00(-10.50,2.00) 792**<br>-0.4(-1.0,0.2)% |
| 2+ yrs aft.                   | 1.00(-7.25,6.25) 119-<br>0.1(-0.7,0.6)%     | -3.00(-9.44,3.00) 639**<br>-0.3(-0.9,0.3)%  |

ESM Table 14: Estimated fold-change (95 % CI) in HbA<sub>1c</sub> yearly pre-exposure and for FM-exposed time compared to the counterfactual- stratified by early adopter status from mixed models adjusting for sex, age, baseline HbA<sub>1c</sub>, and diabetes duration at FM initiation

| Variable                          | Early adopter=No  | Yes               |
|-----------------------------------|-------------------|-------------------|
| Time effect (years)               | 0.99 (0.99; 0.99) | 0.99 (0.98; 0.99) |
| <b>FM usage (ref=no FM usage)</b> |                   |                   |
| 0-1 year                          | 0.94 (0.94; 0.95) | 0.93 (0.92; 0.94) |
| 1-2 years                         | 0.99 (0.98; 1.00) | 0.95 (0.93; 0.96) |
| 2 or more years                   | 1.01 (0.99; 1.04) | 0.98 (0.96; 0.99) |
| Number of observations            | 57077             | 6253              |
| Number of individuals             | 10441             | 912               |

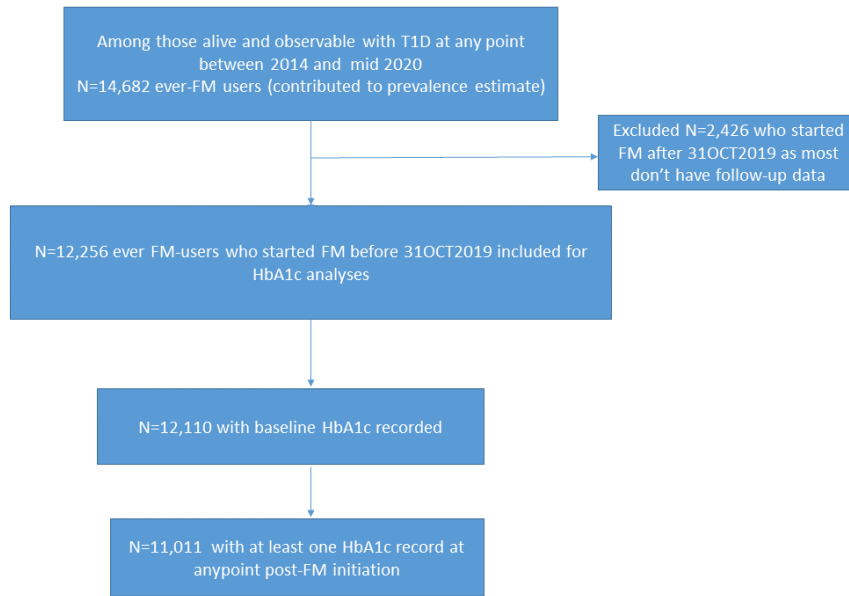

ESM Figure 1: Study sample-size flowchart

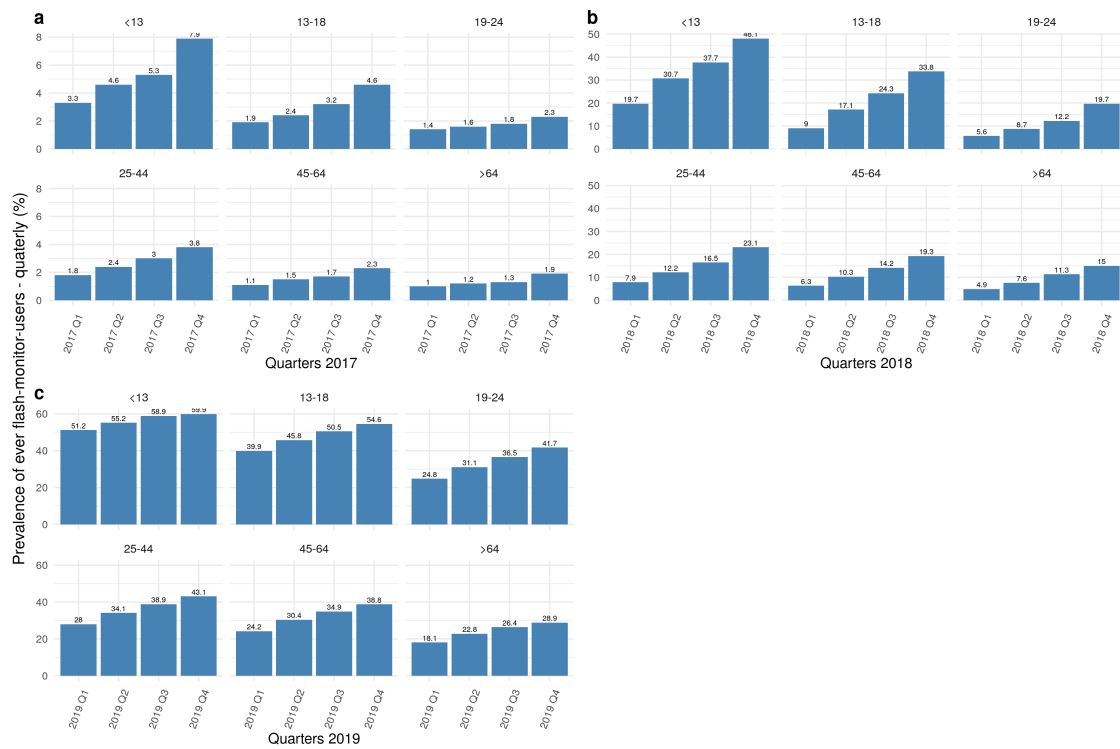

ESM Figure 2: Quarterly prevalence of ever FM users - 2017 (a), 2018 (b), 2019 (c)

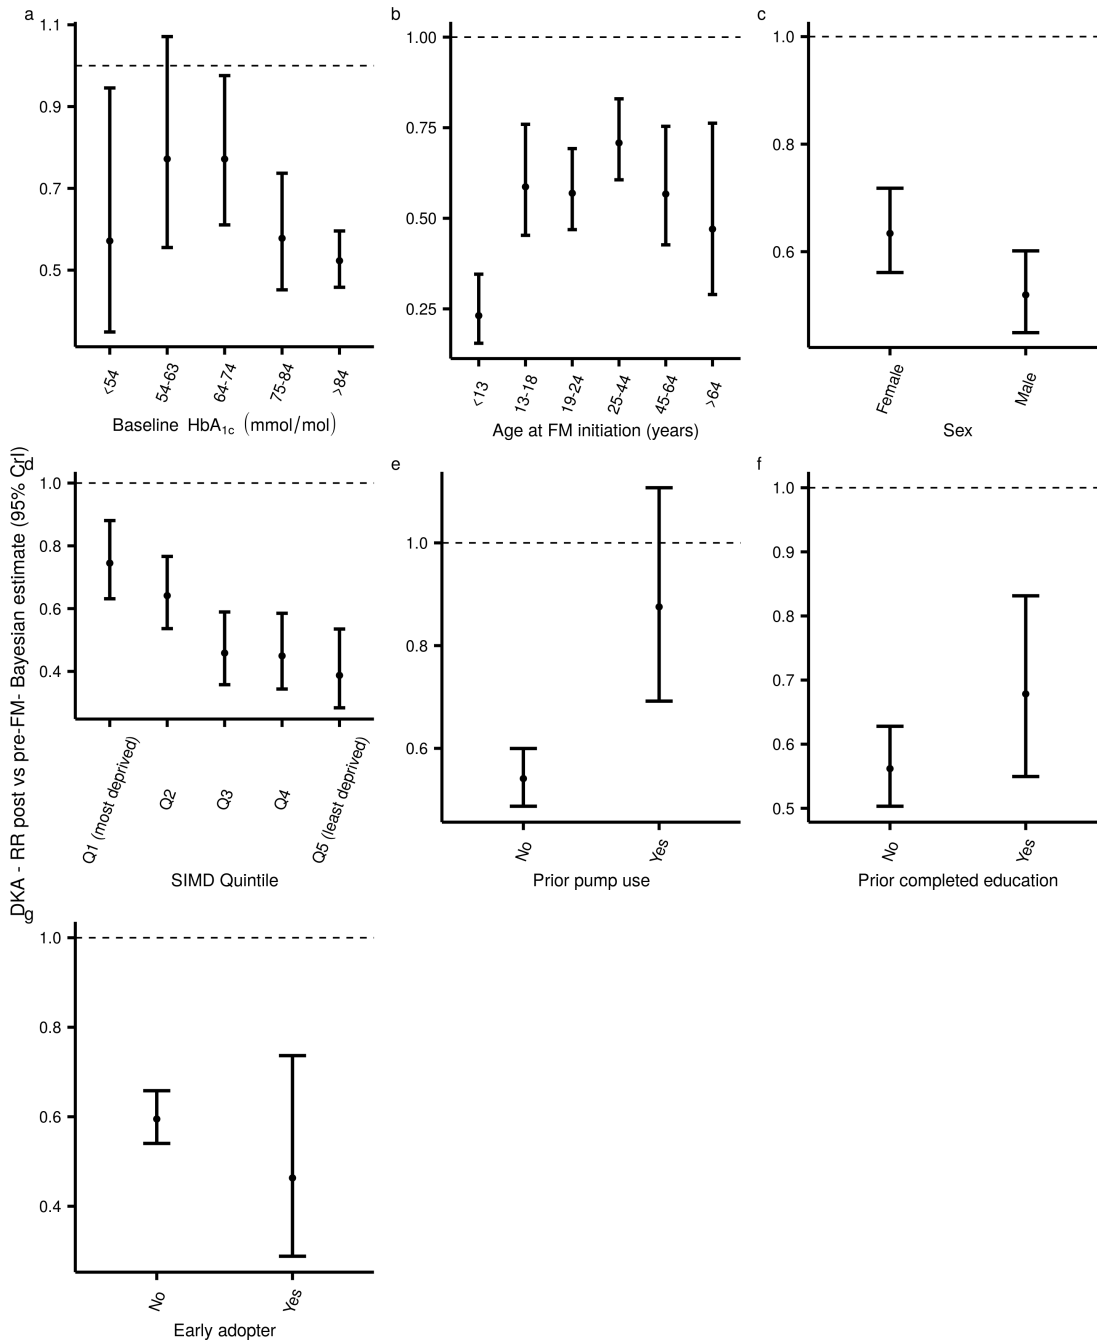

ESM Figure 3: DKA- Rate Ratios- post vs pre-FM initiation- Bayesian posterior mean (95%CrI), adjusted for pre-exposure trend, baseline HbA<sub>1c</sub>, age, sex and diabetes duration - stratified by baseline HbA<sub>1c</sub> (a), age band at FM initiation (b), sex (c), SIMD quintile (d), prior pump usage (e), prior diabetes education programme (f), early adoption (g)
